# Supplementary material for: Oxidized regenerated cellulose induces pleural thickening in patients with pneumothorax: possible involvement of the mesothelial–mesenchymal transition
Source: Springer Nature journal article supplement (doi:10.1007/s00595-017-1597-4), 2017-10-12
Supplement: MOESM1 [file 15129358]

**Supplementary Figure legend:**

**Figure 1.** Representative thoracoscopic view of pleural covering with ORC mesh (patient 1).

A: A part of lung surface area where bulla was resected during VATS is covered with ORC mesh to reinforce the visceral pleura. B: Intraoperative finding of the lung during the operation for recurrent pneumothorax one year later. A black arrow indicates a regenerated bulla. The area covered with ORC one year ago looked white as compared with non-covered lung surface, indicating the thickening of visceral pleura (*).
